1 **Title Page**

2 FARFOOD: A database of potential interactions between food compounds and drugs.

3

4 Ana María Nevado-Bulnes<sup>1</sup>, Dixan Agustín Benítez<sup>2</sup>, Guadalupe Cumplido-Laso<sup>2</sup>, Jose  
5 María Carvajal-González<sup>2</sup>, Sonia Mulero-Navarro<sup>2,\*</sup>, Ángel-Carlos Román<sup>2,\*</sup>

6

7 <sup>1</sup> Servicio Extremeño de Salud (SES), C/Charcón s/n, 10350 – Almaraz (Spain)

8 <sup>2</sup> Departamento de Bioquímica y Biología Molecular y Genética, Universidad de  
9 Extremadura. Avda de Elvas s/n, 06071 – Badajoz (Spain)

10

11 \*Correspondence to [acroman@unex.es](mailto:acroman@unex.es), [smmulero@unex.es](mailto:smmulero@unex.es)

12

13 This paper was supported by the Spanish Ministry of Science through the projects  
14 TED2021-130036B-I00 and PID2020-117467RB-I00 (to SMN and ACR), and  
15 PID2021-126905NB-I00 and TED2021-130560B-I00 (to JMCG). The authors declared  
16 no competing interests for this work.

17

18 Keywords: Food-Drug Interactions, in silico modeling, lisinopril, bupropion, allopurinol

19

20

21

22

23

24

25 **Summary**

26

27 Nutrition is a fundamental aspect in human life development, both from a socio-  
28 economic and medical perspective. In recent years, new personalized approaches have  
29 been added to the biochemical study of nutrients. These approaches consider both the  
30 effect of foods on the body and the role of genes in metabolizing or digesting different  
31 nutrients. Although drug-food interactions have been known for decades, there is a lack  
32 of studies that address these processes in a comprehensive way, using structural and  
33 computational biochemistry techniques. In this paper we develop a method to predict  
34 potential interactions between foods and drugs based on the structural similarity  
35 between food compounds and medications. Our results have produced a database and an  
36 app to consult potential interactions between drugs and foods that we have called  
37 FARFOOD. Additionally, we validated two of these potential interactions with widely  
38 used drugs (lisinopril and bupropion) through structural docking between the ligand  
39 protein and the food compounds that are structurally similar to the drug. Moreover,  
40 patient surveys are used in the lisinopril and bupropion cases in addition to allopurinol  
41 to assess the possible effects of the potentially interacting foods on the symptoms of the  
42 conditions for which the medication is prescribed. In summary, this manuscript presents  
43 an interesting computational resource for predictive food-drug interaction analysis.

44

## 45 **Introduction**

46

47 Food-drug interactions are a crucial yet often underappreciated aspect of patient  
48 care and therapeutic efficacy. The ingestion of certain foods can significantly alter the  
49 pharmacokinetics and pharmacodynamics of drugs, impacting their absorption,  
50 metabolism, and overall effectiveness (Genser, 2008; Z. Hu et al., 2005; Won et al.,  
51 2012). These interactions may lead to reduced therapeutic effects or, conversely, to  
52 toxicity, making it essential for healthcare providers and patients to understand the role  
53 diet plays in the success or failure of drug regimens (Chen et al., 2012; Koziolok et al.,  
54 2019; Won et al., 2012). With the rise of personalized medicine, understanding food-  
55 drug interactions is more important than ever, as individual genetic variations can  
56 influence how drugs and food components interact within the body (Roy et al., 2022;  
57 Wei et al., 2024). Despite the well-documented impact of food-drug interactions on  
58 clinical outcomes, systematic research and data collection in this area are limited. Most  
59 current guidelines focus on well-known interactions (Bailey & Dresser, 2004; Hukkinen  
60 et al., 1995; Mertens-Talcott et al., 2006; Seden et al., 2012; Sica, 2006), but there are  
61 many unexplored interactions that could affect patient safety and drug efficacy,  
62 especially in populations consuming diverse diets.

63

64 This complexity of food-drug interactions is attributed to various factors,  
65 including the biochemical properties of both drugs and food compounds. For instance,  
66 foods containing high levels of specific nutrients, such as calcium or certain fibers, can  
67 inhibit the absorption of certain medications (Aznar-Lou et al., 2019; Deng et al., 2017;  
68 Neuvonen, 1976; Stielow et al., 2023), while others, like those containing grapefruit  
69 compounds, can potentiate drug effects by inhibiting cytochrome P450 enzymes

70 (Mertens-Talcott et al., 2006; Seden et al., 2012). A potential manner for detecting  
71 food-drug interactions is based on structural similarity between food compounds and  
72 drugs, as it has been done with drug-drug interactions (Takeda et al., 2017; Vilar et al.,  
73 2012). Structural similarity implies that certain bioactive compounds in foods may share  
74 similar chemical structures with drug molecules, potentially leading them to bind to the  
75 same target sites in the body. This structural resemblance can result in competition for  
76 binding sites, altering the pharmacokinetics or pharmacodynamics of drugs.  
77 Understanding these structural relationships is increasingly important for creating  
78 dietary guidelines tailored to individual pharmacological needs, especially as dietary  
79 diversity and self-medication continue to rise globally.

80

81 Structural similarity-based predictions provide a unique perspective for  
82 analyzing interactions that might not be evident through traditional pharmacokinetic  
83 studies alone. Computational approaches such as molecular docking (Agu et al., 2023),  
84 quantitative structure-activity relationship (QSAR) modeling (Zaki et al., 2021), and  
85 machine learning (Roy et al., 2022) can be applied to screen food compounds against  
86 drug targets. For example, certain polyphenols in fruits and vegetables have structural  
87 motifs resembling common pharmacophores in drug molecules, allowing them to  
88 interact with cytochrome P450 enzymes, potentially inhibiting or inducing drug  
89 metabolism (Kimura et al., 2010). Such findings remark the need for systematic  
90 screening of food compounds using computational models, which could help predict  
91 and ultimately prevent adverse interactions. This highlights the potential of using  
92 structural similarity as a predictive tool in food-drug interaction research, where  
93 identifying molecular similarities between food and drug compounds can lead to  
94 proactive dietary or medicament doses recommendations.

95

96           The main aim of this manuscript is to develop a comprehensive computational  
97 resource for potential interactions between drugs and food compounds based on  
98 structural similarity. Other recent approaches have used gene expression and other  
99 sources for the development of similar databases (Lacruz-Pleguezuelos et al., 2023). We  
100 considered as hypothesis that if two molecules have a very similar structure, then they  
101 might interact with the same protein targets. We validated some of these interactions  
102 using (i) *in silico* docking experiments that showed how both the drug and the food  
103 compound can bind to the same protein region and (ii) patient surveys in which we  
104 correlate disease parameters with the consumption of foods that contain the potentially  
105 interacting compound.

106

107

## 108 **Materials and Methods**

109

### 110 **Input food compound and drug data**

111 For food-related data, we utilized version 1.0 of FooDB ([www.foodb.ca](http://www.foodb.ca)) , a  
112 comprehensive, publicly funded database supported by the Canadian Institutes of  
113 Health. FooDB provides extensive information on the biology and chemistry of food  
114 components, including macronutrients, micronutrients, and attributes like color, aroma,  
115 flavor, and texture. Each food component entry includes over 100 fields covering  
116 nomenclature, structural and physicochemical properties, food sources, concentrations,  
117 physiological effects, and potential health impacts (Sanchez-Ruiz & Colmenarejo,  
118 2021). For our structural similarity analysis, we used only the structural data (compound  
119 ID and SMILES format), while food source and concentration data were applied in later  
120 analyses and for the app development. For drug information, we employed version 15 of  
121 ChEMBL ([www.ebi.ac.uk/chembl](http://www.ebi.ac.uk/chembl)), a manually curated database of bioactive  
122 molecules maintained by the European Bioinformatics Institute (Gaulton et al., 2011).  
123 ChEMBL includes structural data as well as physicochemical and pharmacological  
124 properties for each molecule, such as molecular weight, Lipinski parameters, ADME  
125 properties, and molecular targets. We filtered ChEMBL entries to include only  
126 molecules approved or in late-stage studies, narrowing the dataset from over two  
127 million entries to approximately 10,000 compounds. For subsequent analyses and the  
128 app, we included each drug's generic name and physicochemical and pharmacological  
129 characteristics.

130

### 131 **Structural comparison between food compounds and drugs**

132 To identify potential interactions between food compounds and drugs, we  
133 conducted a structural similarity analysis between each food compound and drug. This  
134 one-to-one comparison across over 70,000 food compounds and more than 10,000  
135 drugs results in over 700 million possible pairwise comparisons. Due to the scale, these  
136 comparisons were automated using a computational algorithm to process, compare, and  
137 analyze each compound-drug pair. To facilitate this process, we developed a PERL  
138 script that utilizes an external software tool, Open Babel ([www.openbabel.org](http://www.openbabel.org))  
139 (O'Boyle et al., 2011), to generate a list of food compound/drug pairs with structural  
140 similarity above a defined threshold. For similarity measurement, we employed the  
141 Tanimoto index (Tanimoto, 1958), a widely-used metric in cheminformatics based on  
142 molecular fingerprints—a binary encoding of the molecular structure (Willett et al.,  
143 1986). Each fingerprint represents the presence or absence of specific substructures  
144 within a molecule using binary bits. By setting a threshold, we identified molecule pairs  
145 that met or exceeded this similarity score, with higher threshold values indicating  
146 greater structural similarity.

147

#### 148 **Design of FARFOOD database and app**

149 The molecule pairs with Tanimoto index  $> 0.7$  were selected, and the  
150 information obtained from the FooDB and ChEMBL databases was stored as data  
151 tables in MATLAB. To generalize and simplify access to the FARFOOD database, we  
152 developed a cross-platform app using MATLAB's Application Designer. The app is  
153 compatible with Windows, Linux, and macOS, though it requires users to install the  
154 free MATLAB Runtime environment. The app is distributed as an executable file that  
155 can be downloaded from <http://www.github.com/acroman>. The FARFOOD app  
156 provides access to the database information, allowing users to explore drug-food

157 compound interactions, as well as detailed data from ChEMBL and FooDB. The app's  
158 interface prioritizes simplicity, featuring a search bar at the top, a dropdown menu to  
159 select either "ChEMBL ID" or "ChEMBL name," and a search button for easy  
160 querying. The app is centered around drugs, enabling users to quickly identify potential  
161 food interactions for any drug of interest. To enrich the interaction data, the app links  
162 interaction results with additional details on compounds, including the foods containing  
163 each compound and their concentrations. This information is shown in a lower app  
164 window when the user clicks on a compound, enabling a comprehensive view of food  
165 sources and concentrations for each compound involved in a drug interaction.

166

### 167 **Molecular docking**

168 To validate potential interactions between structurally similar food compounds  
169 and drugs, we employed a molecular docking approach (Shoichet, 2004). Docking  
170 analyses require the structure of the target protein and the potential ligand as input,  
171 producing one or more bound conformations of the ligand-protein complex as output.  
172 We selected the target protein for each drug as identified in the FARFOOD database,  
173 which draws on ChEMBL for target information. PDB files for each protein were  
174 downloaded from the Protein Data Bank (Berman et al., 2000). For ligands, we used  
175 both the drug (as a positive control) and the structurally similar food compound. Drug  
176 structures were obtained from ChEMBL, while food compound structures were  
177 retrieved from FooDB and converted from SMILES to PDB format using Open Babel.  
178 Docking was performed using DockThor (<https://www.dockthor.lncc.br/v2/>) (Guedes et  
179 al., 2024), a public server supporting interactive docking. Default conditions, including  
180 blind docking, were applied to ensure comprehensive exploration of binding sites.

181



182 **Patient surveys**

183 Patients with specific drug prescription from the regional healthcare area of  
184 Almaraz were contacted by phone. They were asked for their habits of food  
185 consumption (using foods that contain potentially interacting compounds as well as  
186 other –control- types of food). These results were normalized using the following scale:  
187 0-never; 1-sporadically, once in months; 2- at least once per week; 3-daily consumption.  
188 In addition, they were asked for specific symptoms or characteristics about the diseases  
189 related to the prescription. A minimum of 20 patients were asked for each drug  
190 analyzed, and the demographic data (age and sex) can be consulted in Table 1. The  
191 study protocol was reviewed by the Ethics Board of the University of Extremadura, and  
192 approved with the reference number 167/2023.

193

194

195

196 **Results**

197

198 **Design of a database of potential interactions between drug and food compounds**  
199 **using structural similarity**

200 First we designed a workflow that detected potential interactions between drug  
201 and food compounds based on the structural similarity of each molecule (Figure 1A).  
202 Specifically, we compared the structure of each drug present in ChEMBL database  
203 (N=10,650) with each food compound present in FooDB database (N=70,477). We  
204 retrieved the pairwise relations that presented a Tanimoto Index equal or above 0.7,  
205 resulting in 657,219 potential interactions between drugs and food compounds. We  
206 compiled specific information from both databases in a MATLAB application that can  
207 be freely used (Figure 1B). With this application, a user can search for a specific drug,  
208 and the database will return the specific compounds with structural similarity (Tanimoto  
209 Index equal or above 0.7), the food in which this compound has been detected and its  
210 relative concentration, if known. As expected, the number of drugs that present potential  
211 interactions with food compounds decreases if we increase the Tanimoto Index  
212 threshold (Figure 1C). More than 2,500 drugs in the ChEMBL database present  
213 structural similarities with a Tanimoto Index threshold of 0.7, while more than 1,000  
214 drugs still present structural similarities with a threshold of 0.9. The specificity of the  
215 potential interactions that were predicted is supported because most of the drugs  
216 presented only 1-5 interactions with compounds (Figure 1D). This data showed that a  
217 relevant number of known drugs presented structural similarity to food compounds and  
218 their specificity suggested that they might become candidates for a source of food-drug  
219 interactions.

220

## 221 **Study of the pharmacological and chemical properties of candidate drugs**

222 We explored further the drugs that presented structural similarity with food  
223 compounds, using some of their pharmacological and chemical properties that were  
224 contained in ChEMBL database. The majority (56%) of these drugs were synthetic  
225 small molecules, while 35% of them were from natural origin, a property that could be  
226 linked to their similarity to natural food compounds (Figure 2A). The structure of these  
227 drugs mainly presented single stereoisomerism (47%), with a representative percentage  
228 (27%) being achiral molecules (Figure 2B). As this study focused in the detection of  
229 potential interactions between drugs and food compounds, it was very relevant for us to  
230 assess the percentage of these drugs that are orally administered, as they might directly  
231 interact with the food compounds. We observed that 12% of the drugs that presented  
232 structural similarity with food compounds were orally administered (Figure 2C). In  
233 addition, one of the main classic methods to determine the potential oral bioavailability  
234 of a drug is the Rule of Lipinski or Rule of 5, that characterize the pharmacokinetic  
235 properties of a drug. In this case, 62% of the drugs with potential food interactions  
236 fulfilled this Rule (Figure 2D). Finally, it was also interesting to assess the novelty of  
237 these drugs, but a low percentage (1%) of them were the first-of-class drug on its area  
238 (Figure 2E). This exploratory study confirms that several drug candidates can physically  
239 share the space with food compounds, leading to a more severe interaction in the  
240 digestive system.

241

## 242 **Study case of lisinopril and its potential interaction with cyclospore A.**

243 Lisinopril is a peptidyl dipeptidase inhibitor classified under ACE inhibitors  
244 (angiotensin-converting enzyme inhibitors) (Chase & Sutton, 1989; Lancaster & Todd,  
245 1988). It functions by competitively inhibiting the ACE enzyme, which catalyzes the

246 conversion of angiotensin I to the vasoconstrictor peptide angiotensin II. Angiotensin II  
247 also stimulates aldosterone secretion by the adrenal cortex. Inhibiting ACE reduces  
248 angiotensin II levels, leading to decreased vasopressor activity and reduced aldosterone  
249 secretion, which may increase serum potassium levels. Through this mechanism,  
250 lisinopril acts as a potent vasodilator for both veins and arteries, producing prolonged  
251 hypotensive effects. Lisinopril is primarily indicated for hypertension, offering  
252 advantages over other antihypertensives as it does not interfere with carbohydrate, lipid,  
253 or uric acid metabolism. Additionally, it is used to treat conditions such as heart failure,  
254 acute myocardial infarction, and diabetic nephropathy. A common side effect is a  
255 persistent dry cough, which may lead some patients to discontinue treatment (Y. Hu et  
256 al., 2023). According to DrugStats, lisinopril was the fourth most prescribed drug in the  
257 United States in 2020, with 88,597,017 prescriptions for 19,816,361 patients.

258

259 In terms of potential food-drug interactions, the FARFOOD database estimated  
260 its structural similarity with cyclosquamosin A (Figure 3A, top). Cyclosquamosin A is a  
261 compound found in tropical fruits such as cherimoya (Yang et al., 2008). Interestingly,  
262 other compounds from its same family showed vasorelaxant and anti-inflammatory  
263 activities (Morita et al., 2006; Yang et al., 2008). Since the molecular target of lisinopril  
264 (ACE) is known, we performed docking analyses to examine whether cyclosquamosin  
265 A binds to the same site. It is shown that both compounds have affinity for the same  
266 binding region on ACE (Figure 3A, middle). A closer look at the binding pocket (Figure  
267 3A, bottom) reveals that both compounds occupy the same pocket on ACE, with  
268 cyclosquamosin A forming even more interactions. This supports the possibility of an  
269 interaction between the two molecules. In order to confirm this, we studied if the  
270 consumption of tropical fruits (with content of cyclosquamosin A) in lisinopril patients

271 was associated to the presence of past myocardial infarctions (Figure 3B, top). We  
272 statistically observed that the consumption of tropical fruits was associated to the  
273 absence of myocardial infarctions, while this association was not observed in the case of  
274 other fruit consumption (Figure 3B, bottom). This result supports the idea of a potential  
275 interaction between cyclosquamosin A and lisinopril.

276

### 277 **Study case of bupropion and its potential interaction with hydroxybupropion.**

278 Bupropion is classified under the therapeutic category of other antidepressants  
279 and is primarily indicated for major depressive episodes (Dhillon et al., 2008; Patel et  
280 al., 2016). Its mechanism of action involves the selective inhibition of catecholamine  
281 reuptake, specifically norepinephrine and dopamine, with minimal effect on serotonin  
282 reuptake and no inhibition of monoamine oxidase (Stahl et al., 2004). This selective  
283 inhibition leads to an increase in neurotransmitters within the synaptic cleft, which is  
284 associated with improved mood and a sense of well-being. Bupropion is also approved  
285 as a smoking cessation aid for patients with nicotine dependence, although the exact  
286 mechanism for this effect is not fully understood . It is believed to involve  
287 noradrenergic and/or dopaminergic pathways (Simon et al., 2004). According to  
288 DrugStats, bupropion was the 18th most prescribed medication in the United States in  
289 2020, with 28,889,368 prescriptions for 5,801,282 patients.

290

291 Structural similarity analysis revealed that only hydroxybupropion, a metabolite  
292 of bupropion (Connam et al., 2016), shares a significant structural resemblance with  
293 bupropion itself (Tanimoto index = 0.875; Figure 4A, top). Following FooDB,  
294 hydroxybupropion has been detected, although not quantified, in various foods such as  
295 black gram beans (*Vigna mungo*), chicory leaves (*Cichorium intybus var. foliosum*), red

296 currants (*Ribes rubrum*), and European chestnuts (*Castanea sativa*). Given that the  
297 molecular target of bupropion is known (the dopamine transporter, DAT) (Nemeroff &  
298 Owens, 2009), a docking analysis was conducted to assess whether hydroxybupropion  
299 binds to the same region on DAT using the DockThor server. As shown in figure 4A  
300 (middle), both compounds bound to the same region of DAT, supporting the hypothesis  
301 that hydroxybupropion may interfere with the effect of bupropion if consumed through  
302 foods containing this metabolite. A closer examination of the binding site (Figure 4A,  
303 bottom) illustrates the significant overlap in the binding positions of both molecules,  
304 further supporting the potential for interaction. Previous works suggested that  
305 hydroxybupropion can also reduce depression (Damaj et al., 2004), so we studied if the  
306 patterns in hydroxybupropion-containing food consumption can interact with  
307 parameters related to bupropion prescription. In this case, we observed that the  
308 consumption of chestnuts (food that contains hydroxybupropion) is statistically  
309 associated to mild instead of severe depression in the bupropion patients (Figure 4B,  
310 top). In the case of a control food that does not contain hydroxybupropion, as milk, we  
311 did not observe the same trend (Figure 4B, bottom). As in with lisinopril, this survey  
312 data points to an interaction between the drug and the food compound, or in this case  
313 bupropion and chestnut consumption.

314

### 315 **Study case of allopurinol and its potential interaction with oxypurinol.**

316 Allopurinol is classified as a uric acid production inhibitor, working primarily by  
317 inhibiting xanthine oxidase (Gibson et al., 1982; Seth et al., 2014). This enzyme is  
318 responsible for converting hypoxanthine to xanthine and xanthine to uric acid. By  
319 blocking this pathway, allopurinol reduces uric acid levels both in plasma and urine  
320 (Gibson et al., 1982; Seth et al., 2014). Due to this mechanism, allopurinol is indicated

321 for treating clinical manifestations associated with uric acid deposition, such as gouty  
322 arthritis, cutaneous tophi, and kidney complications involving urate crystal deposits or  
323 kidney stones. Gout, often the primary manifestation of uric acid buildup, can be  
324 aggravated by lifestyle and dietary factors. Foods high in purines, such as red meat and  
325 seafood, as well as fructose-rich fruits and vegetables, exacerbate the condition (Choi et  
326 al., 2004). Conversely, certain foods may alleviate gout symptoms; for example,  
327 cherries have been shown to be associated with lower uric acid levels and reduced gout  
328 attacks (Zhang et al., 2012). Cherries contain anthocyanins, antioxidants that help  
329 decrease inflammation. According to DrugStats, allopurinol was the 42nd most  
330 prescribed medication in the United States in 2020, with 36,600,871 prescriptions for  
331 3,606,249 patients, moving up one rank from 2019.

332

333 A structurally similar compound, oxypurinol (Tanimoto index = 0.88), was  
334 identified as present at high concentrations in beer (Ka et al., 2006). Previous studies  
335 have shown how oxypurinol and allopurinol share xanthine oxidase as protein target  
336 (Sekine et al., 2023). Interestingly, they suggested that the mechanism of inhibition  
337 could be different in both compounds. This led us to investigate whether beer  
338 consumption, with its higher concentration of oxypurinol, might impact patients in the  
339 patients who were prescribed allopurinol. We assessed beer consumption and gout/uric  
340 acid-related symptoms to determine any correlation. Beer consumption was clearly  
341 associated with gout symptoms, particularly in terms of the number of affected joints  
342 and the duration of gout attacks, while the frequency of attacks was less significantly  
343 correlated (Figure 5A). Patients were also surveyed regarding their consumption of  
344 other foods, including red meat. Interestingly, the only significant correlation with red  
345 meat consumption was the frequency of gout attacks—the variable less associated with

346 beer consumption (Figure 5B). This data suggests that the consumption of beer is  
347 affecting gout symptoms through a different way as the consumption of red meat,  
348 pointing to the possible effect of the presence of oxypurinol and its interaction with  
349 allopurinol.

350

351



352 **Discussion**

353

354 In this paper, we developed a novel database with potential interactions between  
355 drugs and food compounds. Our hypothesis is grounded in the principle that a drug's  
356 effect results from its interaction with one or more specific molecular targets, typically  
357 proteins, which are activated or inhibited by the drug, either through direct binding or  
358 competition with other ligands. The pharmacological response observed arises from this  
359 alteration in protein activity, as described in Goodman and Gilman's Manual of  
360 Pharmacology and Therapeutics (Goodman and Gilman 2011), where it is noted that the  
361 effects of most drugs are mediated through their interactions with macromolecular  
362 components of the body. While our hypothesis is theoretically sound and supported by  
363 existing pharmacological frameworks (Shoichet, 2004), there are still potential  
364 limitations in our analysis that could lead to false positives within the FARFOOD  
365 database predictions.

366

367 One major limitation concerns the bioavailability of food compounds at the  
368 target site. Many ingested food compounds undergo extensive metabolism in the  
369 digestive tract and may be transformed before reaching the bloodstream or may be  
370 entirely excreted, thus never reaching the intended target cells. A solution to this  
371 limitation could involve verifying whether the predicted food compounds are indeed  
372 present in human plasma. The Human Metabolome Project (Wishart et al., 2022) is a  
373 valuable resource, containing data on over 35,000 metabolites detected in blood, and  
374 could serve as an experimental filter to validate the presence of specific compounds in  
375 circulation. By cross-referencing FARFOOD predictions with experimentally detected

376 metabolites, we could enhance the reliability of our predictions, focusing on interactions  
377 with compounds confirmed in the bloodstream.

378

379 Another consideration is whether our selected Tanimoto index threshold ( $\geq 0.7$ )  
380 is restrictive enough to minimize false positives. While a higher Tanimoto index implies  
381 greater structural similarity and then a higher likelihood of interaction, it is crucial to  
382 balance sensitivity with specificity. To address this, the Tanimoto index is clearly  
383 displayed in the app interface, providing users with transparency regarding the  
384 interaction likelihood. Furthermore, the molecular docking analyses of lisinopril and  
385 bupropion to evaluate the binding affinity between the drug and its receptor in  
386 comparison with structurally similar food compounds showed a positive result. Docking  
387 studies, which are well-validated across numerous publications (Sousa et al., 2006;  
388 Trott & Olson, 2010), suggest that our computational predictions can reflect  
389 experimentally observed binding behaviors. Nonetheless, experimental validation  
390 remains necessary, and it could include *in vitro* assays where recombinant target  
391 proteins are incubated with mixtures of the drug and food compound to determine  
392 kinetic parameters and binding affinities. Since macromolecular targets are often  
393 located on cell surfaces or within specific intracellular compartments, *in vitro* testing  
394 would provide a precise measure of how food compounds influence the  
395 pharmacodynamics of drugs at the cellular level.

396

397 Moreover, our dietary habit surveys and symptom tracking for patients taking  
398 specific medications also support the existence of interactions between drugs (lisinopril,  
399 bupropion and allopurinol) and structurally similar food compounds. The survey  
400 findings align with our computational predictions and provide real-world evidence of

401 these interactions, but it remains unclear the effect (agonist or antagonist) of the food  
402 compound with the drug. In two examples (lisinopril and bupropion), the consumption  
403 of the structurally similar food compounds correlated with positive clinical measures of  
404 the patients, while in the other example (allopurinol), the consumption of the food was  
405 associated to a negative impact in the disease.

406

407         Additionally, a promising line for future work involves developing a Polygenic  
408 Risk Score (PRS)-like approach (Kachuri et al., 2023; Kullo et al., 2022) tailored to  
409 food-drug interactions. By focusing on the target proteins listed in FARFOOD, we  
410 could identify and map the genes encoding these proteins, as genetic variations  
411 impacting these targets would likely alter the efficacy of drugs and the action of  
412 structurally similar food compounds. If we extend this analysis to food items containing  
413 multiple bioactive compounds, we could construct a PRS-like method specifically for  
414 food-related interactions. This approach would allow us to identify individuals with a  
415 high risk for a particular food, indicating a potential predisposition to altered drug  
416 responses when consuming that food. In summary, our study highlights the potential of  
417 FARFOOD as a predictive tool for identifying food-drug interactions, though further  
418 validation and refinement of these predictive methods are essential for achieving  
419 clinically relevant outcomes.

420

421

422 **Study Highlights**

423

424 ***What is the current knowledge on the topic?***

425 Food-Drug Interactions is a relevant and well-studied field in Pharmacology.

426 Nevertheless, these interactions are detected in a case-by-case manner, leading to

427 multiple undetected interactions with mild consequences in pharmacokinetics.

428 ***What question did this study address?***

429 This study uses structural similarity between compounds as a method to predict

430 potential interactions due to similar protein binding. Using a drug-wide and food-wide

431 system, we predict multiple potential interactions between drugs and food compounds.

432 ***What does this study add to our knowledge?***

433 The main result of this study is a database/application that contains the similarities (and

434 therefore the potential interactions) between drugs and food compounds; in addition, we

435 validate three of these predictions using *in silico* docking as well as patient surveys.

436 ***How might this change clinical pharmacology or translational science?***

437 These results can lead to a deeper analysis of specific drug/food compounds in order to

438 validate additional interactions, and then to novel nutritional recommendations for

439 medicated patients.

440

441

442 **Author Contributions**

443

444 A.C.R. wrote the manuscript; A.C.R. and S.M.N. designed the research; A.M.N.B.

445 performed the research; A.M.N.B., G.C.L., D.A.B and J.M.C.G. analyzed the data;

446

447

448

449 **Acknowledgements**

450

451 This paper was supported by the Spanish Ministry of Science through the  
452 projects TED2021-130036B-I00 and PID2020-117467RB-I00 (to SMN and  
453 ACR), and PID2021-126905NB-I00 and TED2021-130560B-I00 (to JMCG).

454

455 **References**

456

- 457 Agu, P. C., Afiukwa, C. A., Orji, O. U., Ezeh, E. M., Ofoke, I. H., Ogbu, C. O.,  
458 Ugwuja, E. I., & Aja, P. M. (2023). Molecular docking as a tool for the discovery  
459 of molecular targets of nutraceuticals in diseases management. *Scientific Reports*  
460 *2023 13:1*, 13(1), 1–18. <https://doi.org/10.1038/s41598-023-40160-2>
- 461 Aznar-Lou, I., Carbonell-Duacastella, C., Rodriguez, A., Mera, I., & Rubio-Valera, M.  
462 (2019). Prevalence of Medication-Dietary Supplement Combined Use and  
463 Associated Factors. *Nutrients*, *11*(10), 2466. <https://doi.org/10.3390/NU11102466>
- 464 Bailey, D. G., & Dresser, G. K. (2004). Interactions between grapefruit juice and  
465 cardiovascular drugs. *Am J Cardiovasc Drugs*, *4*(5), 281–297.  
466 <https://doi.org/10.2165/00129784-200404050-00002>
- 467 Berman, H. M., Westbrook, J., Feng, Z., Gilliland, G., Bhat, T. N., Weissig, H.,  
468 Shindyalov, I. N., & Bourne, P. E. (2000). The Protein Data Bank. *Nucleic Acids*  
469 *Research*, *28*(1), 235–242. <https://doi.org/10.1093/NAR/28.1.235>
- 470 Chase, S. L., & Sutton, J. D. (1989). Lisinopril: A New Angiotensin Converting  
471 Enzyme Inhibitor. *Pharmacotherapy: The Journal of Human Pharmacology and*  
472 *Drug Therapy*, *9*(3), 120–128. <https://doi.org/10.1002/j.1875-9114.1989.tb04117.x>
- 473 Chen, X.-W., Sneed, K. B., Pan, S.-Y., Cao, C., Kanwar, J. R., Chew, H., & Zhou, S.-F.  
474 (2012). Herb-drug interactions and mechanistic and clinical considerations.  
475 *Current Drug Metabolism*, *13*(5), 640–651.  
476 <https://doi.org/10.2174/1389200211209050640>
- 477 Choi, H. K., Atkinson, K., Karlson, E. W., Willett, W., & Curhan, G. (2004). Purine-  
478 Rich Foods, Dairy and Protein Intake, and the Risk of Gout in Men. *New England*  
479 *Journal of Medicine*, *350*(11), 1093–1103. <https://doi.org/10.1056/nejmoa035700>
- 480 Connarn, J. N., Luo, R., Windak, J., Zhang, X., Babiskin, A., Kelly, M., Harrington, G.,  
481 Ellingrod, V. L., Kamali, M., McInnis, M., & Sun, D. (2016). Identification of  
482 non-reported bupropion metabolites in human plasma. *Biopharmaceutics & Drug*  
483 *Disposition*, *37*(9), 550–560. <https://doi.org/10.1002/BDD.2046>
- 484 Damaj, M. I., Carroll, F. I., Eaton, J. B., Navarro, H. A., Blough, B. E., Mirza, S.,  
485 Lukas, R. J., & Martin, B. R. (2004). Enantioselective effects of hydroxy  
486 metabolites of bupropion on behavior and on function of monoamine transporters  
487 and nicotinic receptors. *Molecular Pharmacology*, *66*(3), 675–682.  
488 <https://doi.org/10.1124/MOL.104.001313>
- 489 Deng, J., Zhu, X., Chen, Z., Fan, C. H., Kwan, H. S., Wong, C. H., Shek, K. Y., Zuo,  
490 Z., & Lam, T. N. (2017). A Review of Food–Drug Interactions on Oral Drug  
491 Absorption. *Drugs 2017 77:17*, *77*(17), 1833–1855.  
492 <https://doi.org/10.1007/S40265-017-0832-Z>
- 493 Dhillon, S., Yang, L. P. H., & Curran, M. P. (2008). Bupropion: a review of its use in  
494 the management of major depressive disorder. *Drugs*, *68*(5), 653–689.  
495 <https://doi.org/10.2165/00003495-200868050-00011>
- 496 Gaulton, A., Bellis, L. J., Bento, A. P., Chambers, J., Davies, M., Hersey, A., Light, Y.,  
497 McGlinchey, S., Michalovich, D., Al-Lazikani, B., & Overington, J. P. (2011).  
498 ChEMBL: a large-scale bioactivity database for drug discovery. *Nucleic Acids*  
499 *Research*, *40*(Database issue), D1100. <https://doi.org/10.1093/NAR/GKR777>
- 500 Genser, D. (2008). Food and drug interaction: consequences for the nutrition/health  
501 status. *Annals of Nutrition & Metabolism*, *52 Suppl 1*(SUPPL. 1), 29–32.  
502 <https://doi.org/10.1159/000115345>

- 503 Gibson, T., Rodgers, V., Potter, C., & Simmonds, H. A. (1982). Allopurinol treatment  
504 and its effect on renal function in gout: A controlled study. *Annals of the*  
505 *Rheumatic Diseases*, 41(1), 59–65. <https://doi.org/10.1136/ARD.41.1.59>  
506 *Goodman and Gilman's Manual of Pharmacology and Therapeutics, 2e |*  
507 *AccessPharmacy | McGraw Hill Medical*. (n.d.). Retrieved November 14, 2024,  
508 from <https://accesspharmacy.mhmedical.com/book.aspx?bookid=1810>
- 509 Guedes, I. A., Pereira da Silva, M. M., Galheigo, M., Krempser, E., de Magalhães, C.  
510 S., Correa Barbosa, H. J., & Dardenne, L. E. (2024). DockThor-VS: A Free  
511 Platform for Receptor-Ligand Virtual Screening. *Journal of Molecular Biology*,  
512 436(17), 168548. <https://doi.org/10.1016/J.JMB.2024.168548>
- 513 Hu, Y., Liang, L., Liu, S., Kung, J. Y., & Banh, H. L. (2023). Angiotensin-converting  
514 enzyme inhibitor induced cough compared with placebo, and other  
515 antihypertensives: A systematic review, and network meta-analysis. *Journal of*  
516 *Clinical Hypertension (Greenwich, Conn.)*, 25(8), 661–688.  
517 <https://doi.org/10.1111/JCH.14695>
- 518 Hu, Z., Yang, X., Ho, P. C. L., Sui, Y. C., Heng, P. W. S., Chan, E., Duan, W., Hwee,  
519 L. K., & Zhou, S. (2005). Herb-drug interactions: A literature review. *Drugs*,  
520 65(9), 1239–1282. <https://doi.org/10.2165/00003495-200565090-00005>
- 521 Hukkinen, S. K., Varhe, A., Olkkola, K. T., & Neuvonen, P. J. (1995). Plasma  
522 concentrations of triazolam are increased by concomitant ingestion of grapefruit  
523 juice. *Clin Pharmacol Ther*, 58(2), 127–131. [https://doi.org/10.1016/0009-](https://doi.org/10.1016/0009-9236(95)90188-4)  
524 [9236\(95\)90188-4](https://doi.org/10.1016/0009-9236(95)90188-4)
- 525 Ka, T., Moriwaki, Y., Inokuchi, T., Yamamoto, A., Takahashi, S., Tsutsumi, Z., &  
526 Yamamoto, T. (2006). Effects of allopurinol on beer-induced increases in plasma  
527 concentrations and urinary excretion of purine bases (uric acid, hypoxanthine, and  
528 xanthine). *Hormone and Metabolic Research = Hormon- Und*  
529 *Stoffwechselforschung = Hormones et Metabolisme*, 38(3), 188–192.  
530 <https://doi.org/10.1055/S-2006-925429>
- 531 Kachuri, L., Chatterjee, N., Hirbo, J., Schaid, D. J., Martin, I., Kullo, I. J., Kenny, E. E.,  
532 Pasaniuc, B., Auer, P. L., Conomos, M. P., Conti, D. V., Ding, Y., Wang, Y.,  
533 Zhang, H., Zhang, Y., Witte, J. S., & Ge, T. (2023). Principles and methods for  
534 transferring polygenic risk scores across global populations. *Nature Reviews*  
535 *Genetics* 2023 25:1, 25(1), 8–25. <https://doi.org/10.1038/s41576-023-00637-2>
- 536 Kimura, Y., Ito, H., Ohnishi, R., & Hatano, T. (2010). Inhibitory effects of polyphenols  
537 on human cytochrome P450 3A4 and 2C9 activity. *Food and Chemical*  
538 *Toxicology*, 48(1), 429–435. <https://doi.org/10.1016/J.FCT.2009.10.041>
- 539 Koziolok, M., Alcaro, S., Augustijns, P., Basit, A. W., Grimm, M., Hens, B., Hoad, C.  
540 L., Jedamzik, P., Madla, C. M., Maliepaard, M., Marciani, L., Maruca, A., Parrott,  
541 N., Pávek, P., Porter, C. J. H., Reppas, C., van Riet-Nales, D., Rubbens, J.,  
542 Statelova, M., ... Corsetti, M. (2019). The mechanisms of pharmacokinetic food-  
543 drug interactions – A perspective from the UNGAP group. *European Journal of*  
544 *Pharmaceutical Sciences*, 134, 31–59. <https://doi.org/10.1016/J.EJPS.2019.04.003>
- 545 Kullo, I. J., Lewis, C. M., Inouye, M., Martin, A. R., Ripatti, S., & Chatterjee, N.  
546 (2022). Polygenic scores in biomedical research. *Nat. Rev. Genet.*, 23(9), 524–532.  
547 <https://doi.org/10.1038/s41576-022-00470-z>
- 548 Lacruz-Pleguezuelos, B., Piette, O., Garranzo, M., Pérez-Serrano, D., Milešević, J.,  
549 Espinosa-Salinas, I., de Molina, A. R., Laguna, T., & de Santa Pau, E. C. (2023).  
550 FooDrugs: a comprehensive food–drug interactions database with text documents  
551 and transcriptional data. *Database*, 2023.  
552 <https://doi.org/10.1093/DATABASE/BAAD075>



- 553 Lancaster, S. G., & Todd, P. A. (1988). Lisinopril. A preliminary review of its  
554 pharmacodynamic and pharmacokinetic properties, and therapeutic use in  
555 hypertension and congestive heart failure. *Drugs*, 35(6), 646–669.  
556 <https://doi.org/10.2165/00003495-198835060-00003>
- 557 Mertens-Talcott, S. U., Zadezensky, I., Castro, W. V. De, Derendorf, H., & Butterweck,  
558 V. (2006). Grapefruit-drug interactions: can interactions with drugs be avoided. *J*  
559 *Clin Pharmacol*, 46(12), 1390–1416. <https://doi.org/10.1177/0091270006294277>
- 560 Morita, H., Iizuka, T., Choo, C. Y., Chan, K. L., Takeya, K., & Kobayashi, J. (2006).  
561 Vasorelaxant activity of cyclic peptide, cyclosquamosin B, from *Annona*  
562 *squamosa*. *Bioorganic & Medicinal Chemistry Letters*, 16(17), 4609–4611.  
563 <https://doi.org/10.1016/j.bmcl.2006.06.008>
- 564 Nemeroff, C. B., & Owens, M. J. (2009). The role of serotonin in the pathophysiology  
565 of depression: As important as ever. *Clinical Chemistry*, 55(8), 1578–1579.  
566 <https://doi.org/10.1373/clinchem.2009.123752>
- 567 Neuvonen, P. J. (1976). Interactions with the absorption of tetracyclines. *Drugs*, 11(1),  
568 45–54. <https://doi.org/10.2165/00003495-197611010-00004>
- 569 O’Boyle, N. M., Banck, M., James, C. A., Morley, C., Vandermeersch, T., &  
570 Hutchison, G. R. (2011). Open Babel: An Open chemical toolbox. *Journal of*  
571 *Cheminformatics*, 3(10), 1–14. <https://doi.org/10.1186/1758-2946-3-33/TABLES/2>
- 572 Patel, K., Allen, S., Haque, M. N., Angelescu, I., Baumeister, D., & Tracy, D. K.  
573 (2016). Bupropion: a systematic review and meta-analysis of effectiveness as an  
574 antidepressant. *Therapeutic Advances in Psychopharmacology*, 6(2), 99.  
575 <https://doi.org/10.1177/2045125316629071>
- 576 Roy, R., Marakkar, S., Vayalil, M. P., Shahanaz, A., Anil, A. P., Kunnathpeedikayil, S.,  
577 Rawal, I., Shetty, K., Shameer, Z., Sathees, S., Prasannakumar, A. P., Mathew, O.  
578 K., Subramanian, L. M., Shameer, K., & Yadav, K. K. (2022). Drug-food  
579 Interactions in the Era of Molecular Big Data, Machine Intelligence, and  
580 Personalized Health. *Recent Advances in Food, Nutrition & Agriculture*, 13(1),  
581 27–50. <https://doi.org/10.2174/2212798412666220620104809>
- 582 Sanchez-Ruiz, A., & Colmenarejo, G. (2021). Updated Prediction of Aggregators and  
583 Assay-Interfering Substructures in Food Compounds. *Journal of Agricultural and*  
584 *Food Chemistry*, 69(50), 15184–15194.  
585 <https://doi.org/10.1021/ACS.JAFC.1C05918>
- 586 Seden, K., Dickinson, L., Khoo, S., & Back, D. (2012). Grapefruit-Drug Interactions.  
587 *Drugs 2010 70:18*, 70(18), 2373–2407. <https://doi.org/10.2165/11585250-000000000-00000>
- 589 Sekine, M., Okamoto, K., Pai, E. F., Nagata, K., Ichida, K., Hille, R., & Nishino, T.  
590 (2023). Allopurinol and oxypurinol differ in their strength and mechanisms of  
591 inhibition of xanthine oxidoreductase. *The Journal of Biological Chemistry*,  
592 299(9), 105189. <https://doi.org/10.1016/j.jbc.2023.105189>
- 593 Seth, R., Kydd, A. S. R., Buchbinder, R., Bombardier, C., & Edwards, C. J. (2014).  
594 Allopurinol for chronic gout. *The Cochrane Database of Systematic Reviews*,  
595 2014(10), CD006077. <https://doi.org/10.1002/14651858.CD006077.PUB3>
- 596 Shoichet, B. K. (2004). Virtual screening of chemical libraries. *Nature 2004 432:7019*,  
597 432(7019), 862–865. <https://doi.org/10.1038/nature03197>
- 598 Sica, D. A. (2006). Interaction of grapefruit juice and calcium channel blockers. *Am J*  
599 *Hypertens*, 19(7), 768–773. <https://doi.org/10.1016/j.amjhyper.2005.11.003>
- 600 Simon, J. A., Duncan, C., Carmody, T. P., & Hudes, E. S. (2004). Bupropion for  
601 Smoking Cessation: A Randomized Trial. *Archives of Internal Medicine*, 164(16),  
602 1797–1803. <https://doi.org/10.1001/ARCHINTE.164.16.1797>

- 603 Sousa, S. F., Fernandes, P. A., & Ramos, M. J. (2006). Protein-ligand docking: Current  
604 status and future challenges. *Proteins: Structure, Function and Genetics*, 65(1),  
605 15–26. <https://doi.org/10.1002/PROT.21082>
- 606 Stahl, S. M., Pradko, J., Haight, B. R., Modell, J. G., Rockett, C. B., & Learned-  
607 Coughlin, S. (2004). A Review of the Neuropharmacology of Bupropion, a Dual  
608 Norepinephrine and Dopamine Reuptake Inhibitor. *Primary Care Companion to*  
609 *The Journal of Clinical Psychiatry*, 6(4), 159.  
610 <https://doi.org/10.4088/PCC.V06N0403>
- 611 Stielow, M., Witczyńska, A., Kubryń, N., Fijałkowski, Ł., Nowaczyk, J., & Nowaczyk,  
612 A. (2023). The Bioavailability of Drugs—The Current State of Knowledge.  
613 *Molecules* 2023, Vol. 28, Page 8038, 28(24), 8038.  
614 <https://doi.org/10.3390/MOLECULES28248038>
- 615 Takeda, T., Hao, M., Cheng, T., Bryant, S. H., & Wang, Y. (2017). Predicting drug-  
616 drug interactions through drug structural similarities and interaction networks  
617 incorporating pharmacokinetics and pharmacodynamics knowledge. *Journal of*  
618 *Cheminformatics*, 9(1), 1–9. [https://doi.org/10.1186/S13321-017-0200-](https://doi.org/10.1186/S13321-017-0200-8/FIGURES/4)  
619 [8/FIGURES/4](https://doi.org/10.1186/S13321-017-0200-8/FIGURES/4)
- 620 Tanimoto, T. T. (1958). An elementary mathematical theory of classification and  
621 prediction. *IBM Internal Report*, 1–10.
- 622 Trott, O., & Olson, A. J. (2010). AutoDock Vina: Improving the speed and accuracy of  
623 docking with a new scoring function, efficient optimization, and multithreading.  
624 *Journal of Computational Chemistry*, 31(2), 455–461.  
625 <https://doi.org/10.1002/JCC.21334>
- 626 Vilar, S., Harpaz, R., Uriarte, E., Santana, L., Rabadan, R., & Friedman, C. (2012).  
627 Drug–drug interaction through molecular structure similarity analysis. *Journal of*  
628 *the American Medical Informatics Association* □: *JAMIA*, 19(6), 1066.  
629 <https://doi.org/10.1136/AMIAJNL-2012-000935>
- 630 Wei, J., Li, Z., Zhuo, L., Fu, X., Wang, M., Li, K., & Chen, C. (2024). Enhancing drug–  
631 food interaction prediction with precision representations through multilevel self-  
632 supervised learning. *Computers in Biology and Medicine*, 171, 108104.  
633 <https://doi.org/10.1016/J.COMPBIOMED.2024.108104>
- 634 Willett, P., Winterman, V., & Bawden, D. (1986). Implementation of Nearest-Neighbor  
635 Searching in an Online Chemical Structure Search System. *Journal of Chemical*  
636 *Information and Computer Sciences*, 26(1), 36–41.  
637 [https://doi.org/10.1021/CI00049A008/ASSET/CI00049A008.FP.PNG\\_V03](https://doi.org/10.1021/CI00049A008/ASSET/CI00049A008.FP.PNG_V03)
- 638 Wishart, D. S., Guo, A. C., Oler, E., Wang, F., Anjum, A., Peters, H., Dizon, R.,  
639 Sayeeda, Z., Tian, S., Lee, B. L., Berjanskii, M., Mah, R., Yamamoto, M., Jovel,  
640 J., Torres-Calzada, C., Hiebert-Giesbrecht, M., Lui, V. W., Varshavi, D., Varshavi,  
641 D., ... Gautam, V. (2022). HMDB 5.0: The Human Metabolome Database for  
642 2022. *Nucleic Acids Research*, 50(D1), D622–D631.  
643 <https://doi.org/10.1093/nar/gkab1062>
- 644 Won, C. S., Oberlies, N. H., & Paine, M. F. (2012). Mechanisms underlying food-drug  
645 interactions: inhibition of intestinal metabolism and transport. *Pharmacology &*  
646 *Therapeutics*, 136(2), 186–201.  
647 <https://doi.org/10.1016/J.PHARMTHERA.2012.08.001>
- 648 Yang, Y. L., Hua, K. F., Chuang, P. H., Wu, S. H., Wu, K. Y., Chang, F. R., & Wu, Y.  
649 C. (2008). New cyclic peptides from the seeds of *Annona squamosa* L. and their  
650 anti-inflammatory activities. *Journal of Agricultural and Food Chemistry*, 56(2),  
651 386–392. <https://doi.org/10.1021/JF072594W>

652 Zaki, M. E. A., Al-Hussain, S. A., Masand, V. H., Akasapu, S., Bajaj, S. O., El-Sayed,  
653 N. N. E., Ghosh, A., & Lewaa, I. (2021). Identification of anti-sars-cov-2  
654 compounds from food using qsar-based virtual screening, molecular docking, and  
655 molecular dynamics simulation analysis. *Pharmaceuticals*, *14*(4), 357.  
656 <https://doi.org/10.3390/PH14040357/S1>  
657 Zhang, Y., Neogi, T., Chen, C., Chaisson, C., Hunter, D. J., & Choi, H. K. (2012).  
658 Cherry Consumption and the Risk of Recurrent Gout Attacks. *Arthritis and*  
659 *Rheumatism*, *64*(12), 4004. <https://doi.org/10.1002/ART.34677>  
660  
661  
662

663 **Figure 1**

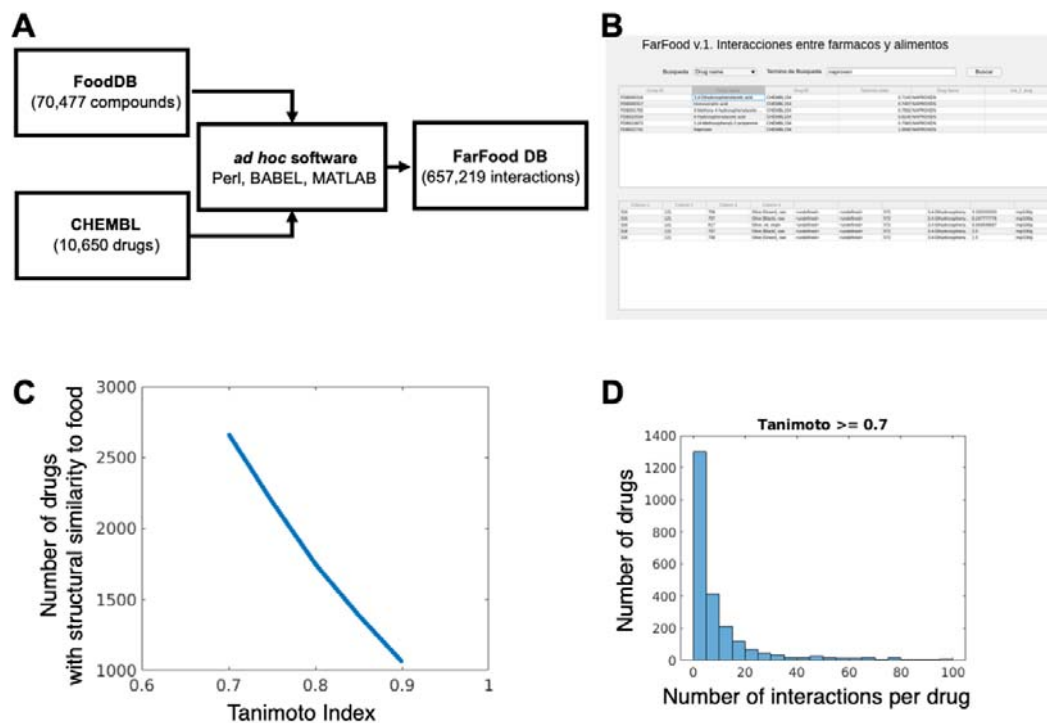

664

665 **Figure 1.** (A) Scheme of the food-wide and drug-wide analysis to detect structural  
666 similarities between drugs and food compounds. (B) Snapshot of the FARFOOD  
667 application available at <https://github.com/angelcroman>. (C) Number of drugs with  
668 potential food interactions depending on the Tanimoto Index. (D) Histogram  
669 representing the different number of food compounds that present structural similarity  
670 to a specific drug.

671

672

673 **Figure 2**

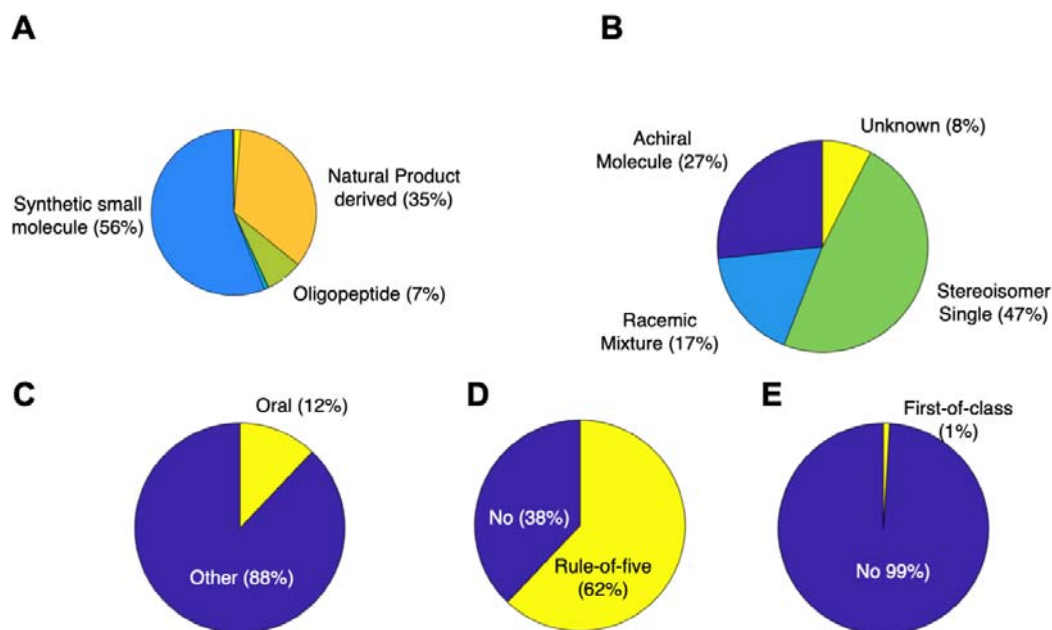

674

675 **Figure 2.** Pie charts categorizing the drugs that presented structural similarities with  
676 food compounds depending on **(A)** the molecular origin of the drug, **(B)** the structural  
677 properties of the drug, **(C)** the administration (oral or not) of the drug, **(D)** the  
678 fulfillment of the Rule-of-five or Rule of Lipinski, and **(E)** the novelty of the drug  
679 among its class.

680

681

682

683 **Figure 3**

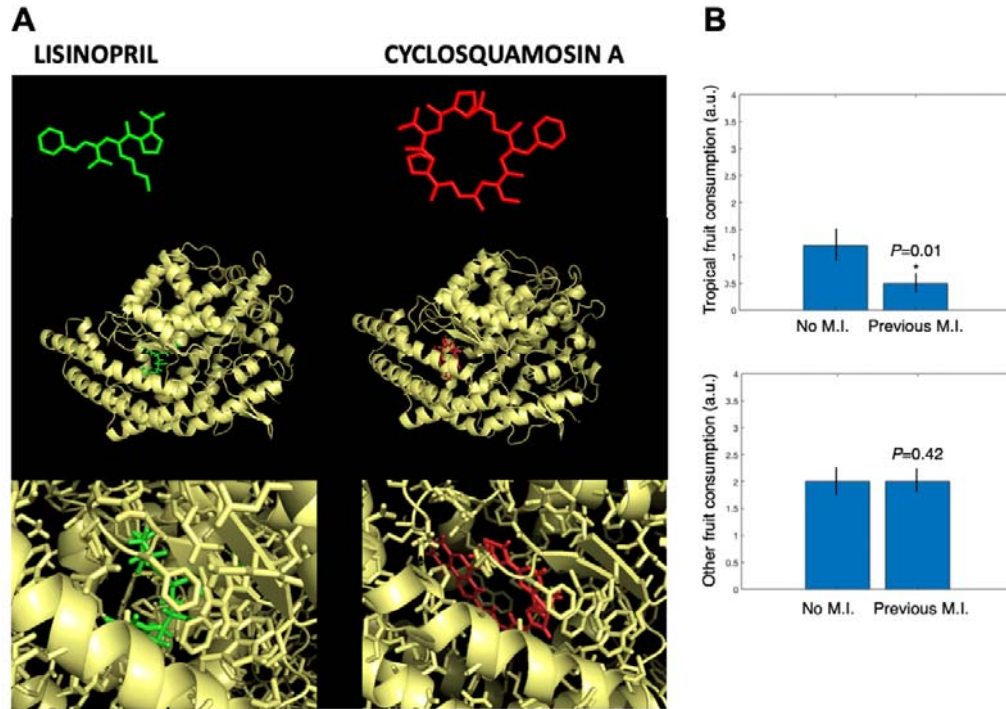

684

685 **Figure 3.** (A) Structures of lisinopril and cyclosporin A (top), as well as the  
686 docking results of both compounds against ACE (middle, bottom). (B) Results from  
687 patient surveys related to tropical (top) or other (bottom) fruit consumption and the  
688 presence of myocardial infarctions (M.I).

689

690



691 **Figure 4.**

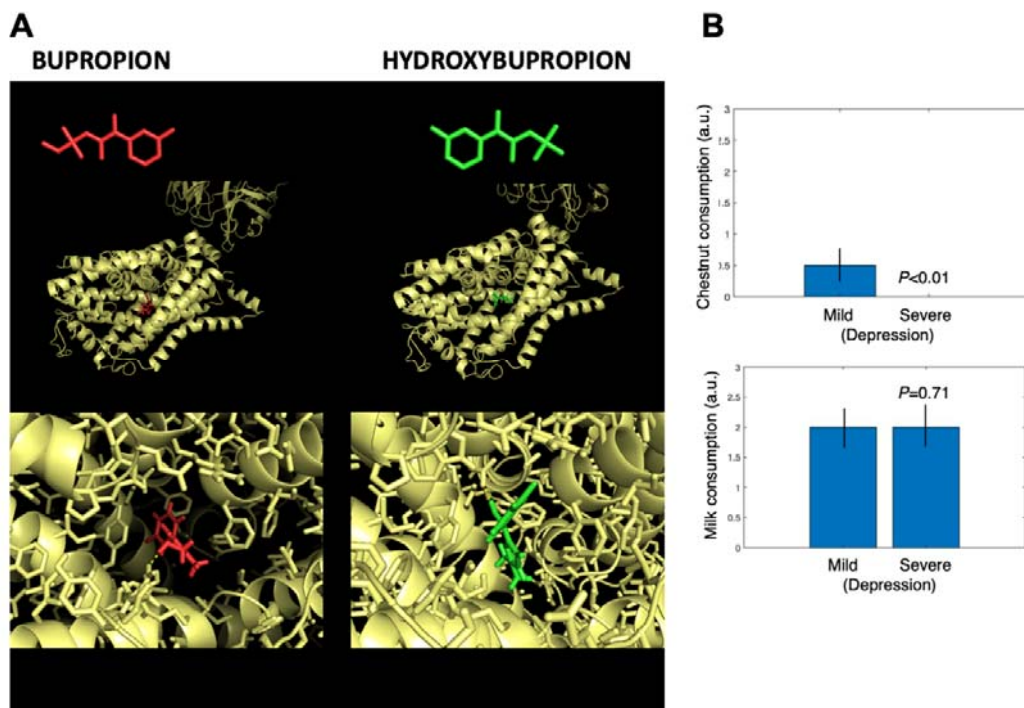

692

693 **Figure 4.** (A) Structures of bupropion and hydroxybupropion (top), as well as the  
694 docking results of both compounds against DAT (middle, bottom). (B) Results from  
695 patient surveys related to chestnut (top) or milk (bottom) consumption and the presence  
696 of episodes of mild or severe depression.

697

698

699 **Figure 5**

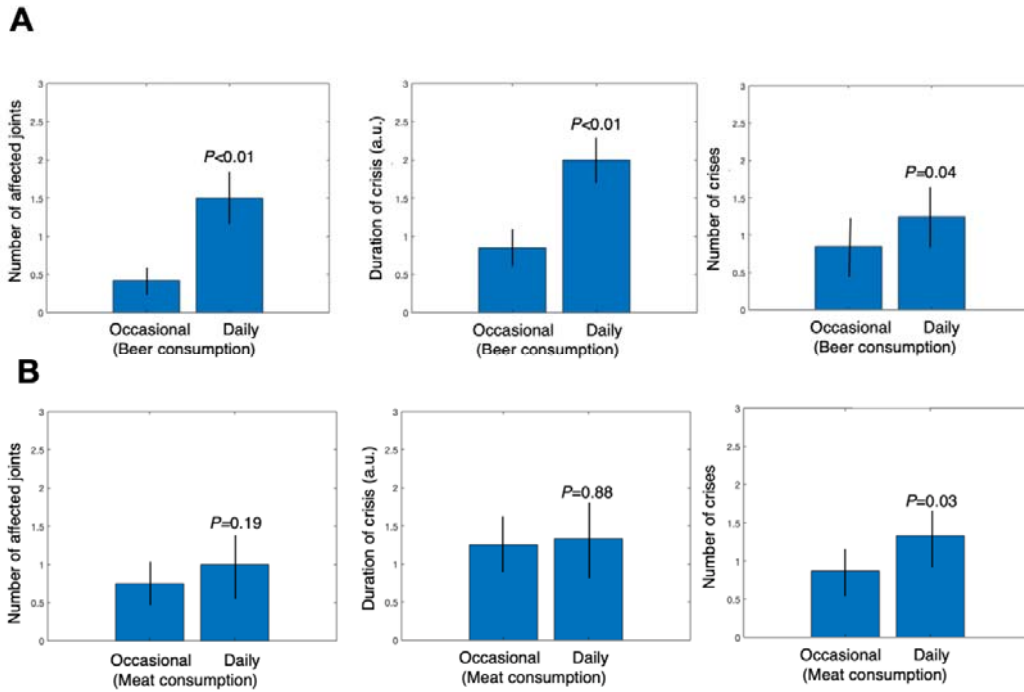

700

701 **Figure 5. (A)** Results from patient (allopurinol) surveys related to beer consumption  
702 and the reference of number of affected joints (left), duration of gout crises (middle) and  
703 the number of gout crises (right). **(B)** Same as in A, but for meat consumption.

704

705



706 **Table 1.** Demographic data of patients used in the study

707

| <b>Drug</b> | <b>Sex (Female %)</b> | <b>Age (Mean/SD years)</b> |
|-------------|-----------------------|----------------------------|
| Lisinopril  | 48%                   | 75.2/12.3                  |
| Bupropion   | 55%                   | 51.1/20.4                  |
| Allopurinol | 22%                   | 73.1/18.8                  |

708

709
